# Supplementary material
Source: MDPI journal article supplement (https://www.mdpi.com/2311-5637/7/4/213)

# **Development of a new assay for measuring H<sub>2</sub>S production during alcoholic fermentation.**

## **Application to the evaluation of the main factors impacting H<sub>2</sub>S production by three *Saccharomyces cerevisiae* wine strains**

Irene de Guidi <sup>1</sup>, Vincent Farines <sup>1</sup>, Jean-Luc Legras <sup>1\*</sup> and Bruno Blondin <sup>1</sup>

<sup>1</sup> SPO, Univ Montpellier, INRAE, Institut Agro, Montpellier, France;  
irene.de-guidi@inrae.fr IDG, Vincent.farines@inrae.fr (VF),  
jean-luc.legras@inrae.fr (JLL), bruno.blondin@supagro.fr (BB)

\* Correspondence: jean-luc.legras@inrae.fr

| <b>TABLE OF CONTENTS</b>                                                                                                                                                                               | <b>PAGE</b> |
|--------------------------------------------------------------------------------------------------------------------------------------------------------------------------------------------------------|-------------|
| <b>1. <sup>1</sup>H NMR of probe: full spectrum</b>                                                                                                                                                    | <b>2</b>    |
| <b>2. <sup>1</sup>H NMR of probe: spectrum enlargements</b>                                                                                                                                            | <b>2</b>    |
| <b>3. <sup>1</sup>H NMR of probe: aromatic proton region showing chemical shifts, coupling constants, the integration, in relative values, of the multiplets / singlet of the molecule of interest</b> | <b>3</b>    |
| <b>4. <sup>13</sup>C NMR of probe: full spectrum</b>                                                                                                                                                   | <b>3</b>    |
| <b>5. <sup>13</sup>C NMR of probe: spectrum region of carbon chemical shifts of the of the molecule of interest</b>                                                                                    | <b>3</b>    |

## 1. $^1\text{H}$ NMR of probe: full spectra

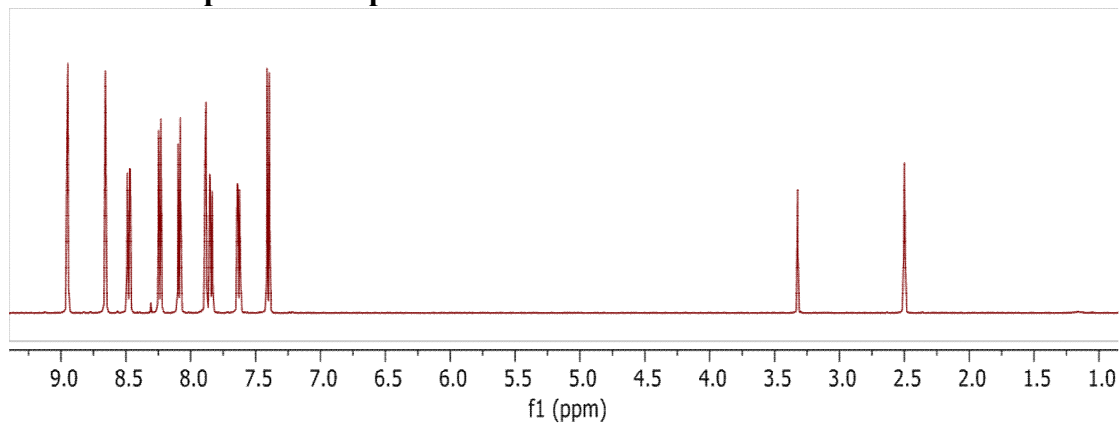

## 2. $^1\text{H}$ NMR of probe: spectra enlargements

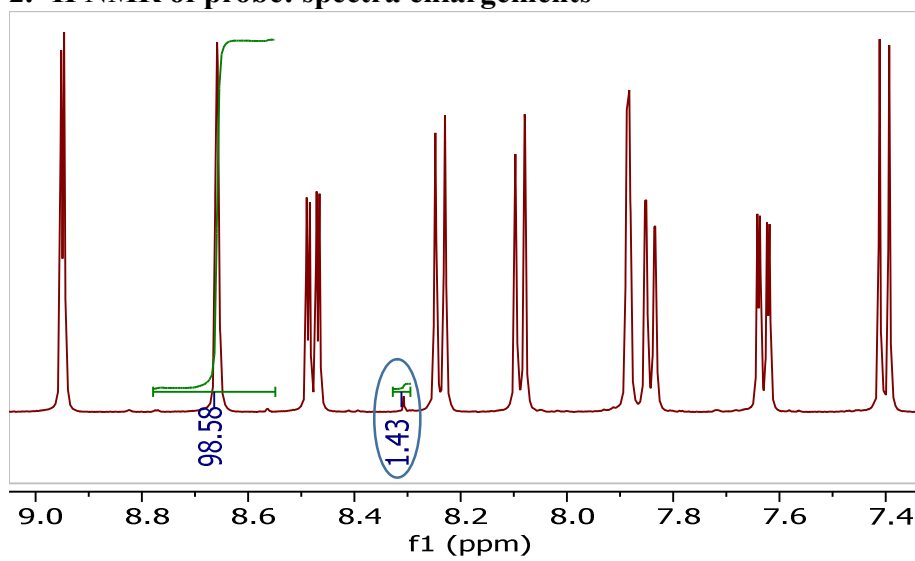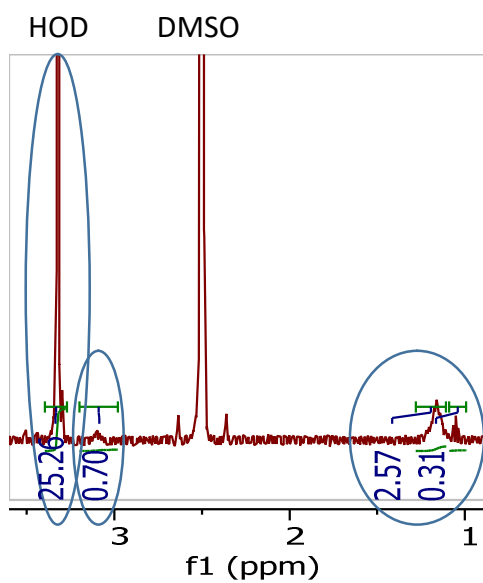

### 3. $^1\text{H}$ NMR of probe: aromatic proton region

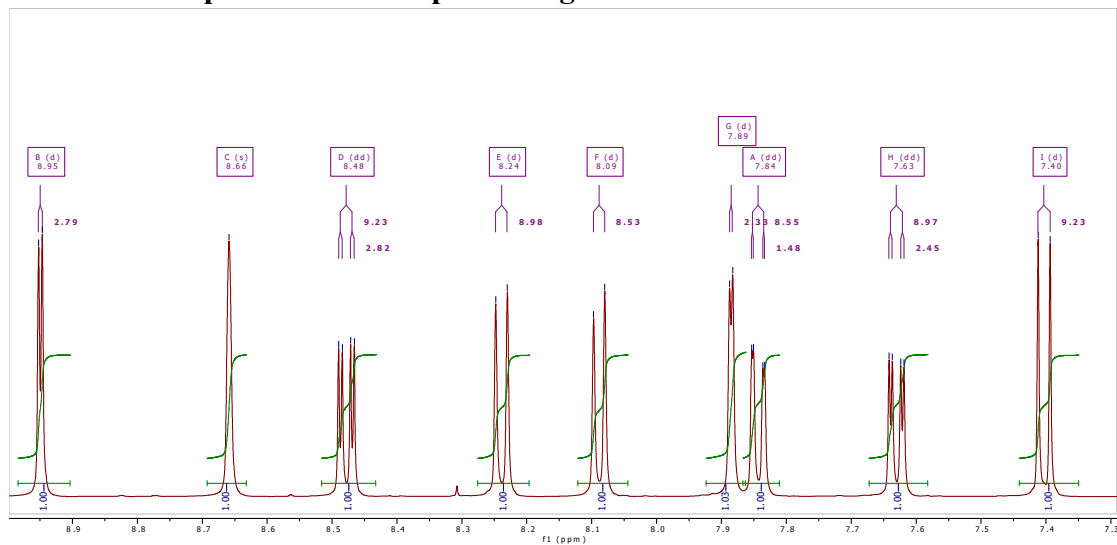

### 4. $^{13}\text{C}$ NMR of probe: full spectra

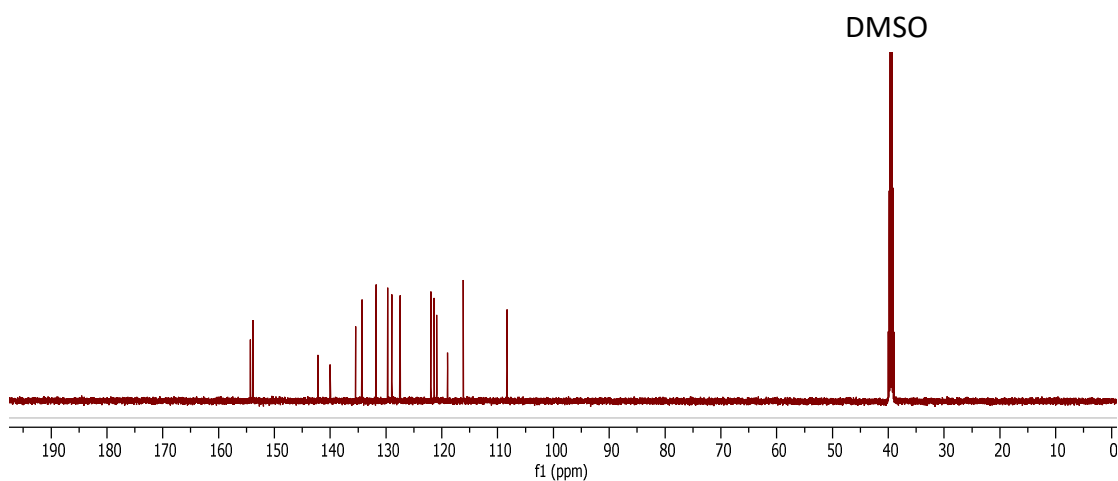

### 5. $^{13}\text{C}$ NMR of probe: spectrum region of carbon chemical shifts

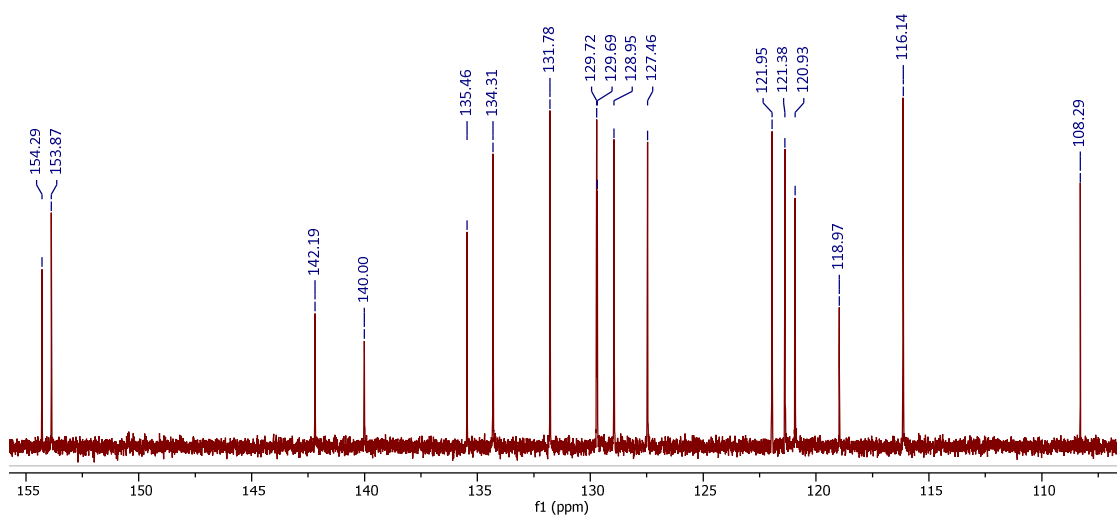

Supplement: s1 [file s1]
