# Supplementary material
Source: MDPI journal article supplement (https://www.mdpi.com/2311-5637/7/4/213)

Time to consume 95% of sugar

87.4 g/L of CO<sub>2</sub> produced

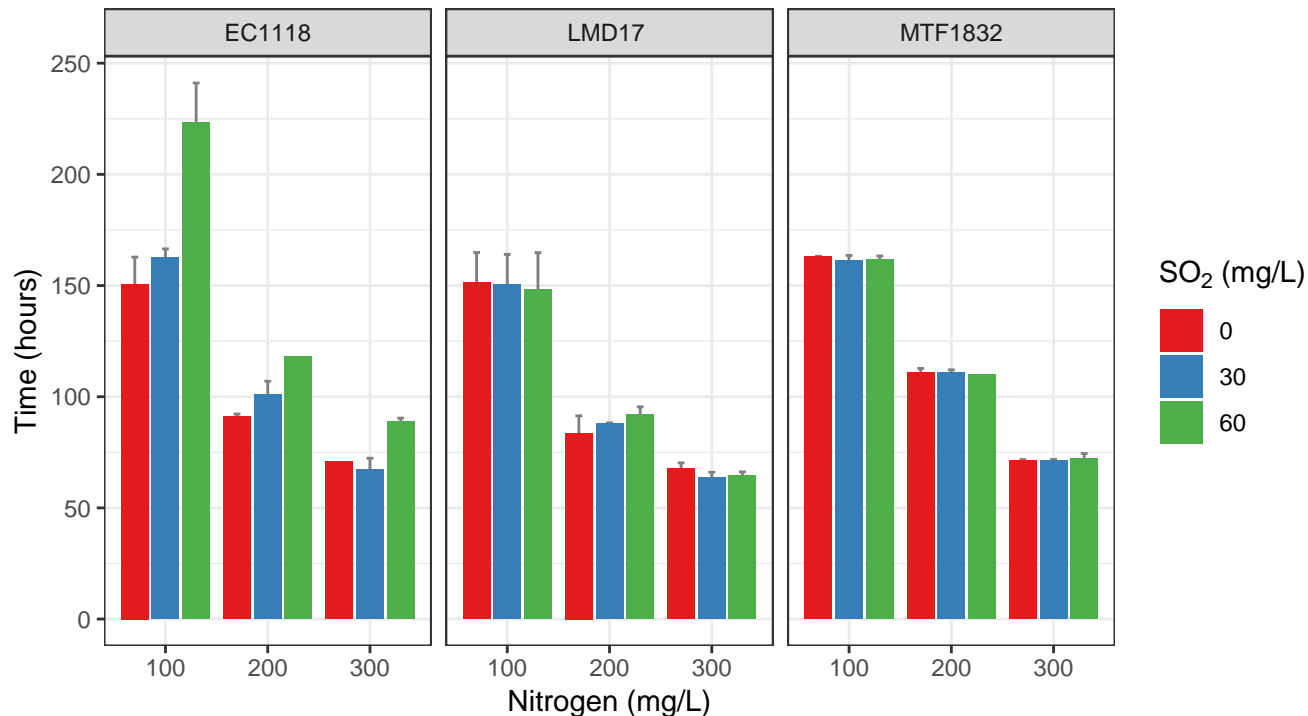

Supplement: s1 [file s1]
